# Supplementary material
Source: Springer Nature journal article supplement (https://www.springermedizin.de/resource/supplementary/13685_2014_31_MOESM13_ESM.pdf/9681246)

## Body Weights

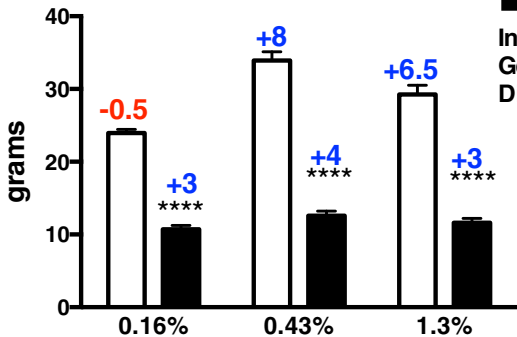

## Liver weights

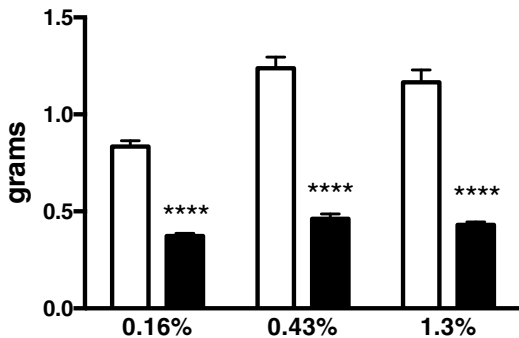

% Methionine

Supplement: MOESM13 [file 9681246]
